# Supplementary material for: pH and molecular weight dependence of auric acid reduction by polyethylenimine and the gene transfection efficiency of cationic gold nanoparticles thereof
Source: Royal Society of Chemistry journal article supplement (doi:10.1039/c8nj00628h), 2018-01-01
Supplement: c8nj00628h1.pdf [file c8nj00628h1.pdf]

## **Supporting information**

# **pH and molecular weight dependence of auric acid reduction by polyethylenimine and the gene transfection efficiency of the cationic gold nanoparticles thereof**

O. Cavuslar,<sup>a</sup> C. Celaloglu,<sup>b</sup> F. D. Duman,<sup>b</sup> Y. U. Konca,<sup>b</sup> M. B. Yagci<sup>c</sup> and

H. Yagci Acar <sup>a,b,c</sup>

<sup>a</sup>Koc University, Graduate School of Materials Science and Engineering, Rumelifeneri Yolu, Sariyer 34450, Istanbul, Turkey; E-mail: fyagci@ku.edu.tr

<sup>b</sup>Koc University, Department of Chemistry, Rumelifeneri Yolu, Sariyer 34450, Istanbul, Turkey.

<sup>c</sup>Koc University, KUYTAM, Rumelifeneri Yolu, Sariyer 34450, Istanbul, Turkey.

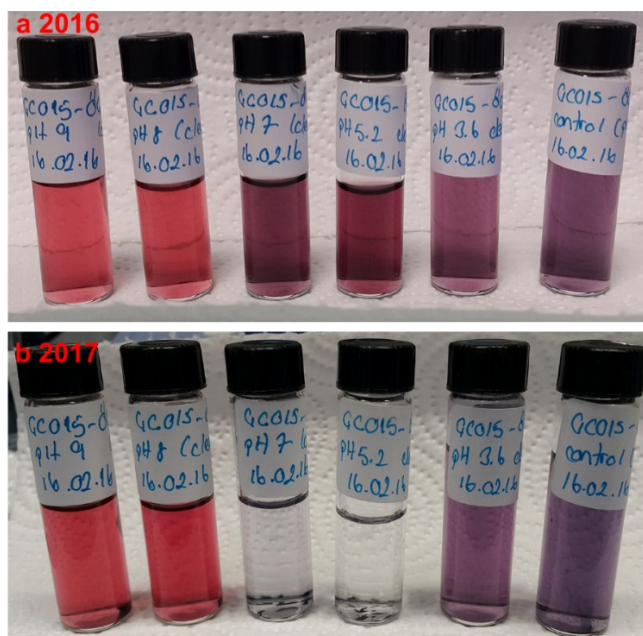

**Fig. S1** From left to right pictures of PEI25-Au synthesized at pH 9, 8, 7, 5.2, 3.6 and control (no pH adjustment) a) after being washed following the synthesis step and b) after 1 year storage at room temperature.

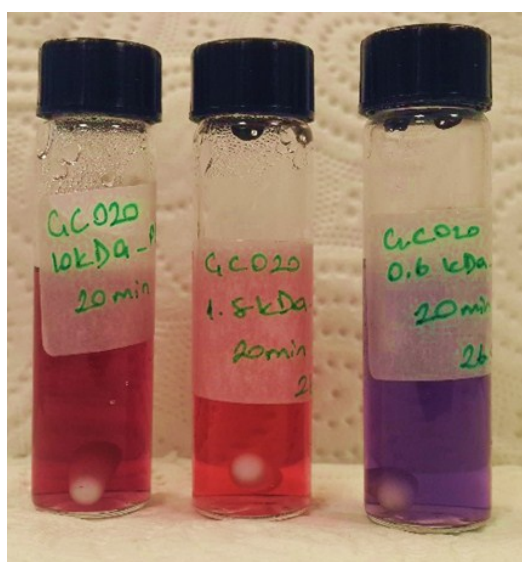

**Fig. S2** Pictures of PEI10-Au, PEI1.8-Au and PEI0.6-Au after synthesis (no pH adjustment).

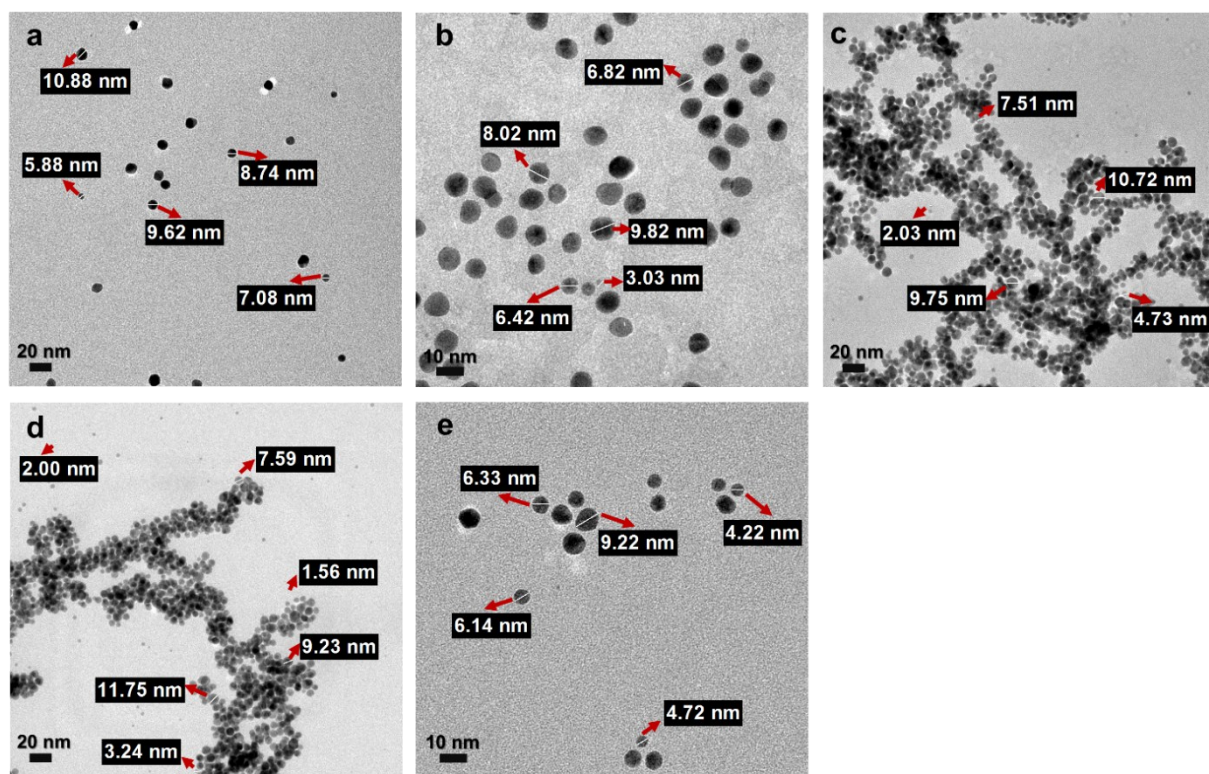

**Fig. S3** TEM images of a) PEI1.8-Au, b) PEI1.8-Au synthesized at pH 9, c) PEI10-Au, d) PEI25-Au and e) PEI25-Au synthesized at pH 9.

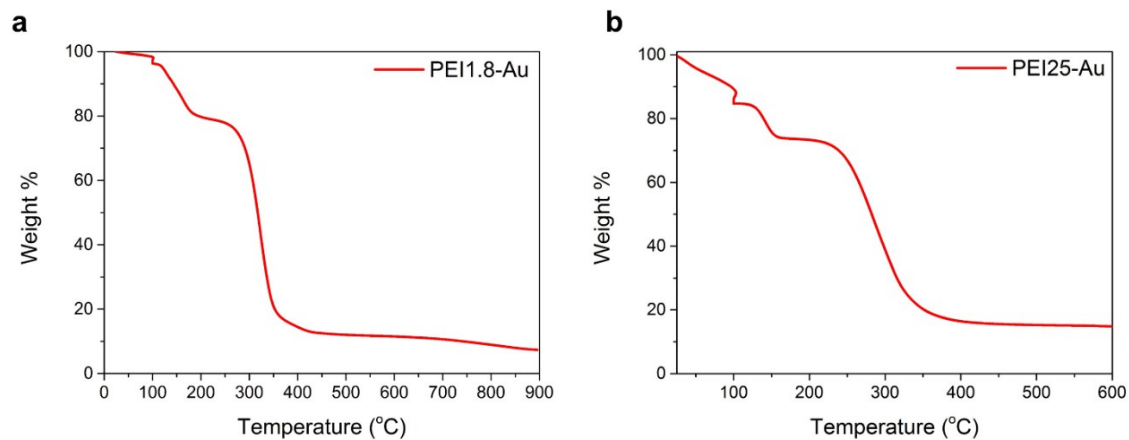

**Fig. S4** Thermal gravimetric analysis (TGA) of a) PEI1.8-Au synthesized at pH 9, b) PEI25-Au synthesized at pH 9. Weight loss at 100 °C is due to the water loss during the isothermal step.

**Table S1.** Binding energies of N1s, C1s and Au 4f core level in PEI25-Au synthesized at pH 9.5 and 3.5.

|           | Binding energies (eV) |                             |             |        |                 |                 |
|-----------|-----------------------|-----------------------------|-------------|--------|-----------------|-----------------|
|           | <b>N 1s</b>           |                             | <b>C 1s</b> |        | <b>Au 4f</b>    |                 |
|           | Free amines           | Bound and/or reduced amines | C-N         | C=N    | Au <sup>0</sup> | Au <sup>+</sup> |
| At pH 9.5 | 399.09                | 400.23                      | 284.86      | 287.21 | 83.84           | 84.86           |
| At pH 3.5 | 399.02                | 400.63                      | 285.32      | 287.88 | 83.06           | 84.08           |

**Table S2.** Atomic ratio of C, N, Au in the PEI25-Au synthesized at different pH values

| <b>Atomic Ratio</b>                  | <b>pH 9.5</b> | <b>pH 3.5</b> |
|--------------------------------------|---------------|---------------|
| N <sub>bound</sub> /N <sub>tot</sub> | 0.64          | 0.09          |
| C=N/C <sub>tot</sub>                 | 0.15          | 0.065         |
| Au <sup>0</sup> /Au <sub>tot</sub>   | 0.80          | 0.71          |
| N/Au                                 | 428           | 291           |
| N <sub>400</sub> /Au <sub>83</sub>   | 342.50        | 40.60         |

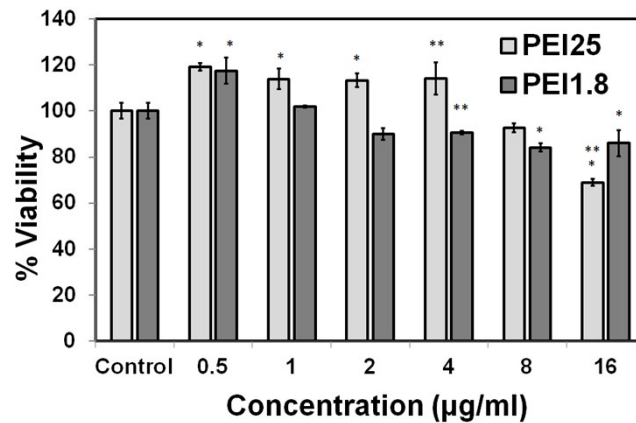

**Fig. S5** Dose dependent viability of HEK293T cells treated with bPEI 25kDa and bPEI 1.8kDa as measured by MTT assay after 24 h incubation with the polymer. Each column represents the mean with error bars representing  $\pm$ SD ( $n=3$ ),  $p<0.05$ . \* shows statistically significant difference from the control, and \*\* shows statistically significant difference from the 8  $\mu$ g/ml dose.

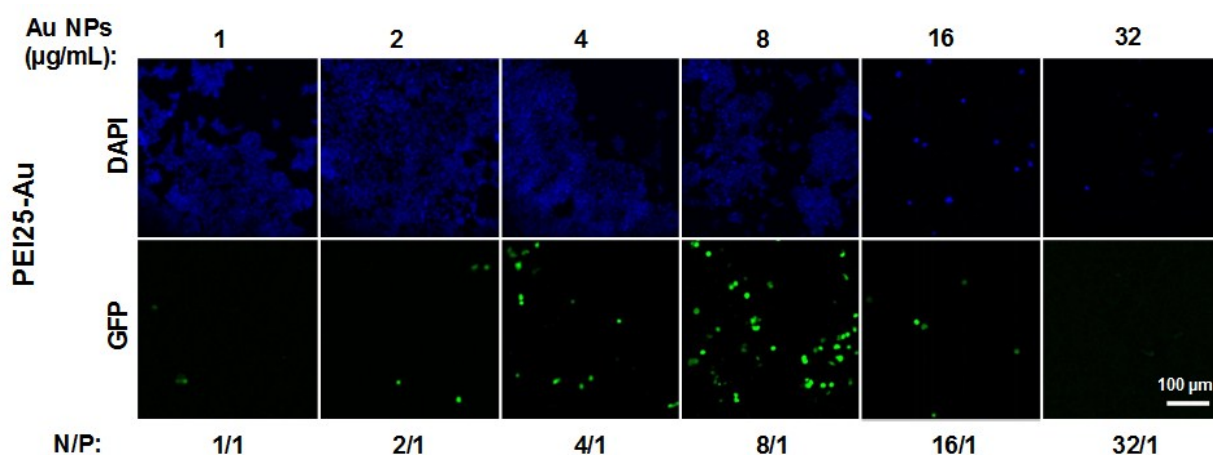

**Fig. S6** Inverted fluorescence microscopy images of HEK 293T cells after 48 h post-transfection with pMax-GFP vector by PEI25-Au nanoparticles at different N/P ratios. pDNA was used at fixed concentration (2.33 µg/mL). Cell nuclei were stained with DAPI (blue color).

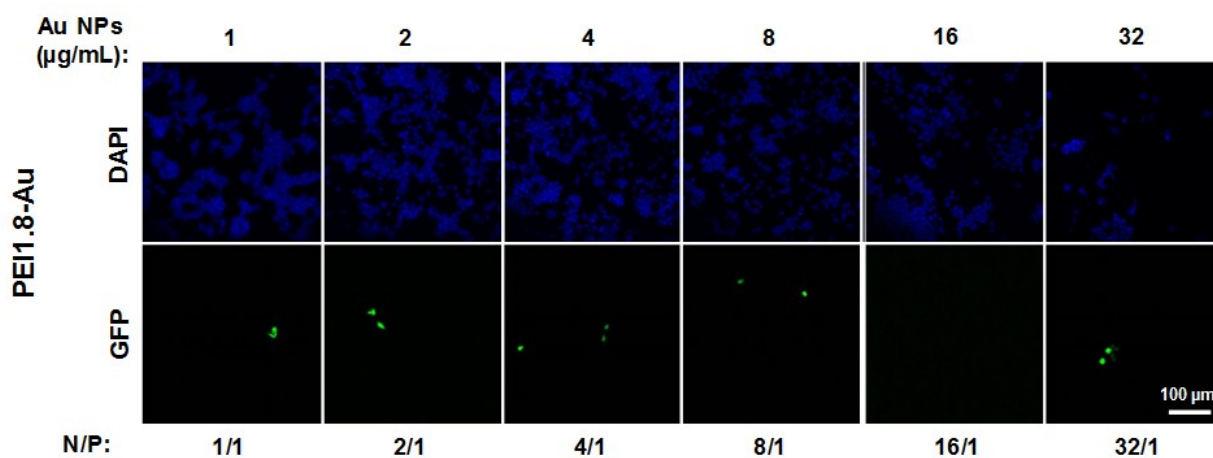

**Fig. S7** Inverted fluorescence microscopy images of HEK 293T cells after 48 h post-transfection with pMax-GFP vector by PEI1.8-Au nanoparticles at different N/P ratios. pDNA was used at fixed concentration (2.33 µg/mL). Blue color is DAPI staining showing cell nuclei.
